# Supplementary material for: Pre-existing infant antibody-dependent cellular cytotoxicity associates with reduced HIV-1 acquisition and lower morbidity
Source: PubMed Central journal article supplement — Cell Rep Med. 2021 Oct 19;2(10):100412. doi: 10.1016/j.xcrm.2021.100412 (PMC8561235; doi:10.1016/j.xcrm.2021.100412), 2021-10-19
Supplement: mmc1.pdf [file mmc1.pdf]

**Cell Reports Medicine, Volume 2**

**Supplemental information**

**Pre-existing infant antibody-dependent cellular  
cytotoxicity associates with reduced HIV-1  
acquisition and lower morbidity**

**Allison S. Thomas, Yvetane Moreau, Wenqing Jiang, John E. Isaac, Alexander Ewing, Laura F. White, Athena P. Kourtis, and Manish Sagar**

Supplementary Information for

**Pre-existing infant antibody-dependent cellular cytotoxicity  
associates with reduced HIV-1 acquisition and lower morbidity.**

Thomas *et al.*

**Table S1.** Demographics for HIV-1 transmitting and non-transmitting mother-infant pairs<sup>a</sup>  
(Related to Figure 1)

| <b>Demographic parameters<sup>b</sup></b>        | <b>TM/HEI</b>    | <b>NTM/HEU</b>   |
|--------------------------------------------------|------------------|------------------|
| Mothers - Number                                 | 16               | 26               |
| Age, years                                       | 26 (19-37)       | 26 (20-33)       |
| Time PP Sample Collection, days                  | 78 (12-260)      | 74 (1-256)       |
| CD4 cells/mm <sup>3</sup>                        | 352 (210-595)    | 372 (258-677)    |
| Log <sub>10</sub> plasma VL                      | 4.80 (3.70-5.70) | 4.82 (3.12-5.99) |
| Infants - Number                                 | 15 <sup>c</sup>  | 26               |
| 1 <sup>st</sup> day detected as HIV <sup>+</sup> | 114 (42-293)     |                  |
| Birth weight, kg                                 | 3.0 (2.5-4.0)    | 3.0 (2.3-3.7)    |
| Female (%)                                       | 6 (40.0)         | 10 (38.5)        |
| SAE ≥ Grade 4 or death (%)                       | 5 (33.3)         | 6 (23.1)         |

<sup>a</sup>TM, transmitting mothers; NTM, non-transmitting mothers; HEI, HIV-exposed infected; HEU, HIV-exposed uninfected; PP, postpartum; SAE, serious adverse event; VL, viral load

<sup>b</sup>Mean values are shown with ranges given in parentheses

<sup>c</sup>ADCC could not be examined in 1 infant plasma because of insufficient sample (infant ID 99)

**Table S2.** Infant, maternal, BMS, and BM IgG ADCC<sub>AUC</sub> and Neut<sub>AUC</sub> with PCR method for maternal Env amplification. (Related to Figure 1)

| ID   | Outcome | PCR method | If SGA, # of amplicons combined | Infant ADCC <sub>AUC</sub> | Maternal ADCC <sub>AUC</sub> | BMS ADCC <sub>AUC</sub> | BM IgG ADCC <sub>AUC</sub> | Infant Neut <sub>AUC</sub> | Maternal Neut <sub>AUC</sub> |
|------|---------|------------|---------------------------------|----------------------------|------------------------------|-------------------------|----------------------------|----------------------------|------------------------------|
| 1152 | NTM     | SGA        | 5                               | 0.17                       | 0.25                         | 0.06                    | 0.12                       | 0.28                       | 0.24                         |
| 1015 | NTM     | SGA        | 30                              | 0.05                       | 0.17                         | 0.02                    | 0.10                       | 0.49                       | 0.07                         |
| 1782 | NTM     | SGA        | 29                              | 0.02                       | 0.07                         | 0.02                    | 0.15                       | 0.32                       | 0.18                         |
| 1476 | NTM     | SGA        | 12                              | 0.36                       | 0.35                         | 0.08                    | 0.19                       | 0.37                       | 0.14                         |
| 1021 | NTM     | SGA        | 1                               | 0.07                       | 0.31                         | 0.00                    | 0.05                       | ND                         | ND                           |
| 1363 | NTM     | SGA        | 16                              | 0.05                       | 0.14                         | 0.00                    | 0.09                       | 0.47                       | 0.11                         |
| 1666 | NTM     | SGA        | 2                               | 0.28                       | 0.51                         | 0.12                    | 0.17                       | 0.43                       | 0.04                         |
| 1061 | NTM     | Bulk       | --                              | 0.19                       | 0.14                         | 0.03                    | 0.08                       | 0.13                       | 0.00                         |
| 1227 | NTM     | SGA        | 2                               | 0.27                       | 0.44                         | 0.19                    | 0.34                       | 0.34                       | 0.01                         |
| 771  | NTM     | SGA        | 10                              | 0.37                       | 0.38                         | 0.15                    | 0.15                       | 0.37                       | 0.20                         |
| 1715 | NTM     | SGA + Bulk | 17                              | 0.04                       | 0.03                         | 0.00                    | 0.04                       | 0.00                       | 0.00                         |
| 317  | NTM     | SGA        | 9                               | 0.08                       | 0.32                         | 0.16                    | 0.22                       | 0.28                       | 0.16                         |
| 1444 | NTM     | SGA + Bulk | 16                              | 0.09                       | 0.20                         | 0.04                    | 0.05                       | 0.28                       | 0.15                         |
| 1379 | NTM     | SGA        | 30                              | 0.06                       | 0.31                         | 0.00                    | 0.06                       | 0.29                       | 0.14                         |
| 1431 | NTM     | Bulk       | --                              | 0.32                       | 0.36                         | 0.16                    | 0.14                       | 0.27                       | 0.27                         |
| 2163 | NTM     | Bulk       | --                              | 0.04                       | 0.15                         | 0.00                    | 0.04                       | 0.25                       | 0.19                         |
| 60   | NTM     | SGA        | 10                              | 0.11                       | 0.17                         | 0.00                    | 0.17                       | 0.14                       | 0.24                         |
| 1148 | NTM     | Bulk       | --                              | 0.10                       | 0.18                         | 0.00                    | 0.02                       | 0.25                       | 0.15                         |
| 399  | NTM     | SGA        | 16                              | 0.08                       | 0.15                         | 0.02                    | 0.08                       | 0.00                       | 0.15                         |
| 1225 | NTM     | Bulk       | --                              | 0.02                       | 0.32                         | 0.03                    | 0.08                       | ND                         | ND                           |
| 355  | NTM     | Bulk       | --                              | 0.41                       | 0.52                         | 0.18                    | 0.02                       | 0.02                       | 0.00                         |
| 1037 | NTM     | Bulk       | --                              | 0.23                       | 0.26                         | 0.10                    | 0.14                       | 0.12                       | 0.11                         |
| 196  | NTM     | Bulk       | --                              | 0.04                       | 0.11                         | 0.01                    | 0.07                       | 0.20                       | 0.15                         |
| 1047 | NTM     | SGA        | 30                              | 0.05                       | 0.14                         | 0.07                    | 0.06                       | 0.15                       | 0.00                         |
| 572  | NTM     | Bulk       | --                              | 0.28                       | 0.35                         | 0.07                    | 0.10                       | 0.27                       | 0.13                         |
| 1289 | NTM     | SGA        | 24                              | 0.45                       | 0.62                         | 0.10                    | 0.08                       | 0.08                       | 0.13                         |
| 99   | TM      | SGA        | 12                              | ND                         | 0.52                         | 0.09                    | 0.15                       | 0.17                       | 0.21                         |
| 129  | TM      | SGA        | 18                              | 0.06                       | 0.17                         | 0.00                    | 0.16                       | 0.31                       | 0.23                         |
| 146  | TM      | Bulk       | --                              | 0.22                       | 0.14                         | 0.04                    | 0.03                       | 0.33                       | 0.27                         |
| 170  | TM      | SGA        | 12                              | 0.03                       | 0.11                         | 0.07                    | 0.10                       | 0.20                       | 0.30                         |
| 302  | TM      | SGA        | 3                               | 0.07                       | 0.20                         | 0.06                    | 0.22                       | 0.15                       | 0.10                         |
| 774  | TM      | SGA        | 8                               | 0.08                       | 0.15                         | 0.00                    | 0.05                       | 0.11                       | 0.12                         |
| 779  | TM      | SGA        | 21                              | 0.00                       | 0.02                         | 0.00                    | 0.04                       | 0.00                       | 0.20                         |
| 804  | TM      | SGA + Bulk | 14                              | 0.02                       | 0.03                         | 0.00                    | 0.08                       | 0.04                       | 0.07                         |
| 878  | TM      | SGA        | 8                               | 0.04                       | 0.06                         | 0.02                    | 0.09                       | 0.37                       | 0.12                         |
| 1295 | TM      | Bulk       | --                              | 0.21                       | 0.22                         | 0.01                    | 0.11                       | 0.21                       | 0.33                         |
| 1402 | TM      | Bulk       | --                              | 0.15                       | 0.24                         | 0.07                    | 0.10                       | 0.08                       | 0.24                         |
| 1459 | TM      | SGA        | 3                               | 0.05                       | 0.28                         | 0.06                    | 0.03                       | 0.47                       | 0.03                         |
| 1785 | TM      | Bulk       | --                              | 0.07                       | 0.13                         | 0.07                    | 0.25                       | 0.09                       | 0.02                         |
| 1844 | TM      | SGA        | 2                               | 0.06                       | 0.23                         | 0.03                    | 0.09                       | 0.00                       | 0.00                         |
| 1997 | TM      | SGA        | 3                               | 0.25                       | 0.50                         | 0.13                    | 0.28                       | 0.34                       | 0.28                         |
| 2315 | TM      | Bulk       | --                              | 0.13                       | 0.27                         | 0.03                    | 0.08                       | 0.00                       | 0.3                          |

TM, transmission; NTM, no transmission; SGA, single genome amplification; BMS, breast milk supernatant; BM IgG, IgG isolated from breast milk; Neut, neutralization  
 ND: not done due to insufficient sample.

**Table S3.** Serious Adverse Events (SAE)  $\geq 4$  or death in BAN Cohort. (Related to Figure 2)

| <b>Patient ID</b> | <b>If infected, days PP to infant first HIV+ DNA PCR</b> | <b>Days to SAE <math>\geq 4</math> or death</b> | <b>SAE type</b> | <b>SAE grade</b> |
|-------------------|----------------------------------------------------------|-------------------------------------------------|-----------------|------------------|
| <b>99</b>         | 55                                                       | 331                                             | Meningitis      | 4                |
| <b>146</b>        | 83                                                       | 354                                             | Gastroenteritis | 5                |
| <b>170</b>        | 127                                                      | 306                                             | Gastroenteritis | 5                |
| <b>804</b>        | 129                                                      | 169                                             | Death           | 5                |
| <b>878</b>        | 56                                                       | 221                                             | Death           | 5                |
| <b>1459</b>       | 127                                                      | 253                                             | Pneumonia       | 5                |
| <b>317</b>        | --                                                       | 351                                             | Anemia          | 4                |
| <b>355</b>        | --                                                       | 352                                             | Anemia          | 4                |
| <b>1225</b>       | --                                                       | 133                                             | Anemia          | 4                |
| <b>1289</b>       | --                                                       | 283                                             | Death           | 5                |
| <b>1379</b>       | --                                                       | 218                                             | Pneumonia       | 4                |
| <b>1666</b>       | --                                                       | 113                                             | Death           | 5                |

\*Patient ID 99 was not examined for infant ADCC due to insufficient sample

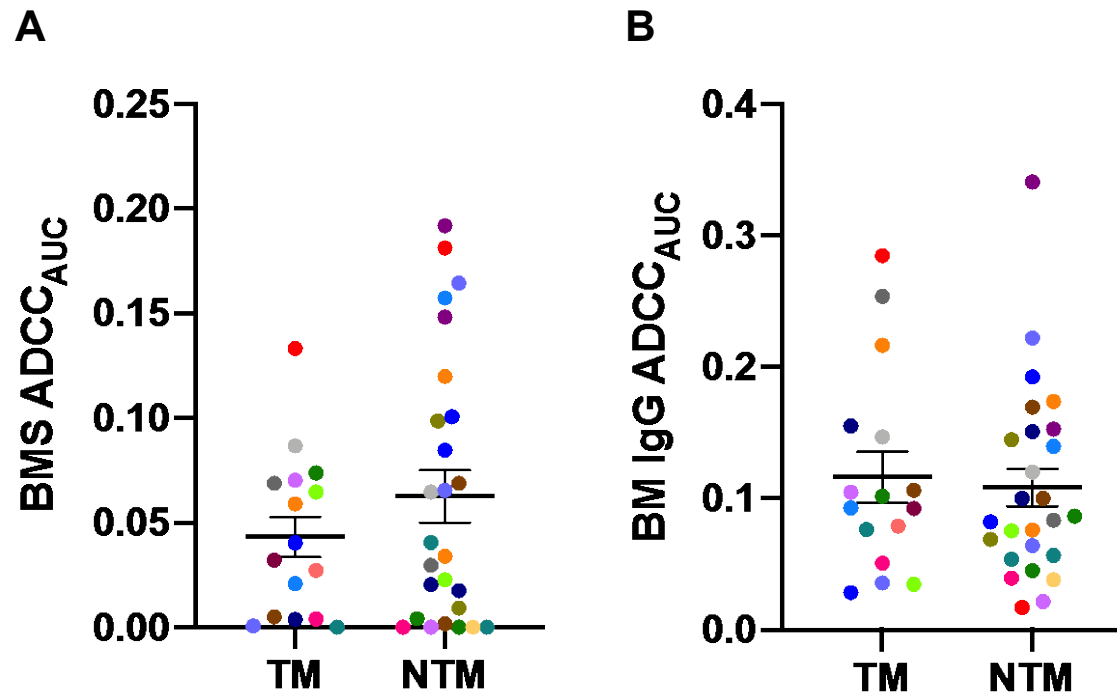

**Figure S1. ADCC responses in breast milk supernatant (BMS) and IgG isolated from breast milk (BM IgG) against autologous strains.** BMS (A) and BM IgG (B) from transmitting (TM) and non-transmitting (NTM) mothers ADCC<sub>AUC</sub>. Colors signify matched pairs. Each dot represents a unique individual. Bars show mean and standard error. All points represent average from a minimum of 2 replicates. Related to Figure 1.

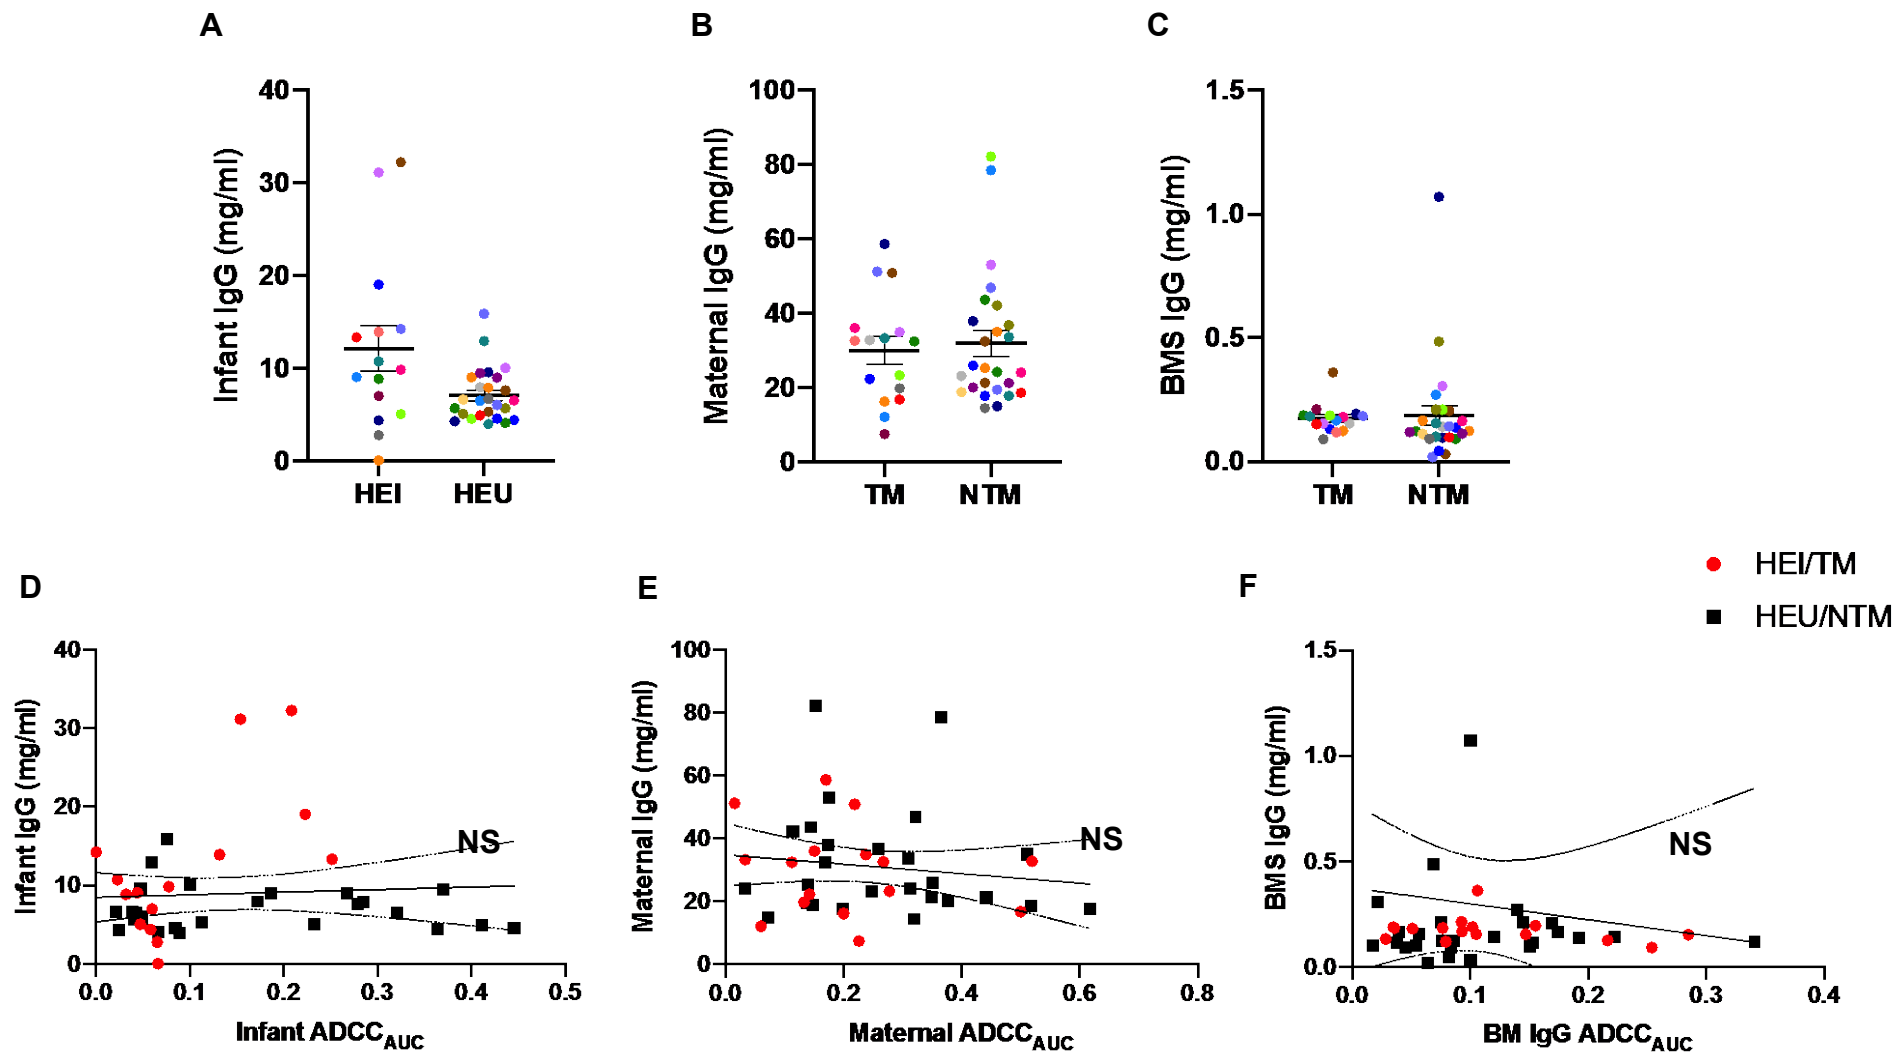

**Figure S2. Immunoglobulin differences and relation to ADCC.** Total IgG levels (A-C) and comparison to ADCC<sub>AUC</sub> (D-F) in infants' plasma (A&D), mothers' plasma (B&E) and mothers' breast milk supernatant (C&F). The red and black dots indicate TMs/ HEI and NTMs/ HEU infants respectively, and colors in (A-C) signify matched pairs. Correlations were assessed using Spearman's statistic. Line indicates linear regression fit with 95% confidence interval. NS indicates not significant. Related to Figure 3.

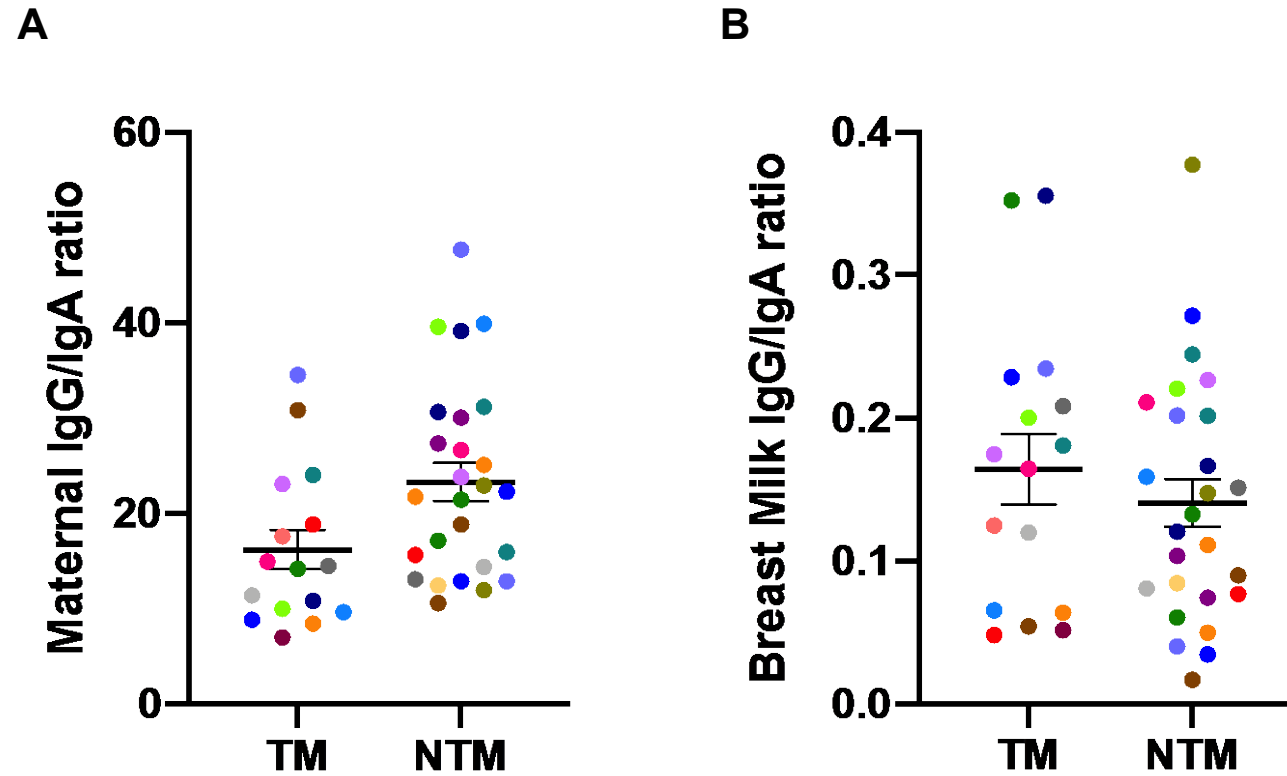

**Figure S3. Immunoglobulin IgG/IgA ratios.** IgG to IgA ratio in maternal plasma (A) and breast milk supernatant (B). Colors signify matched pairs. Each dot represents a unique individual. Bars show mean and standard error. Related to Figure 3.



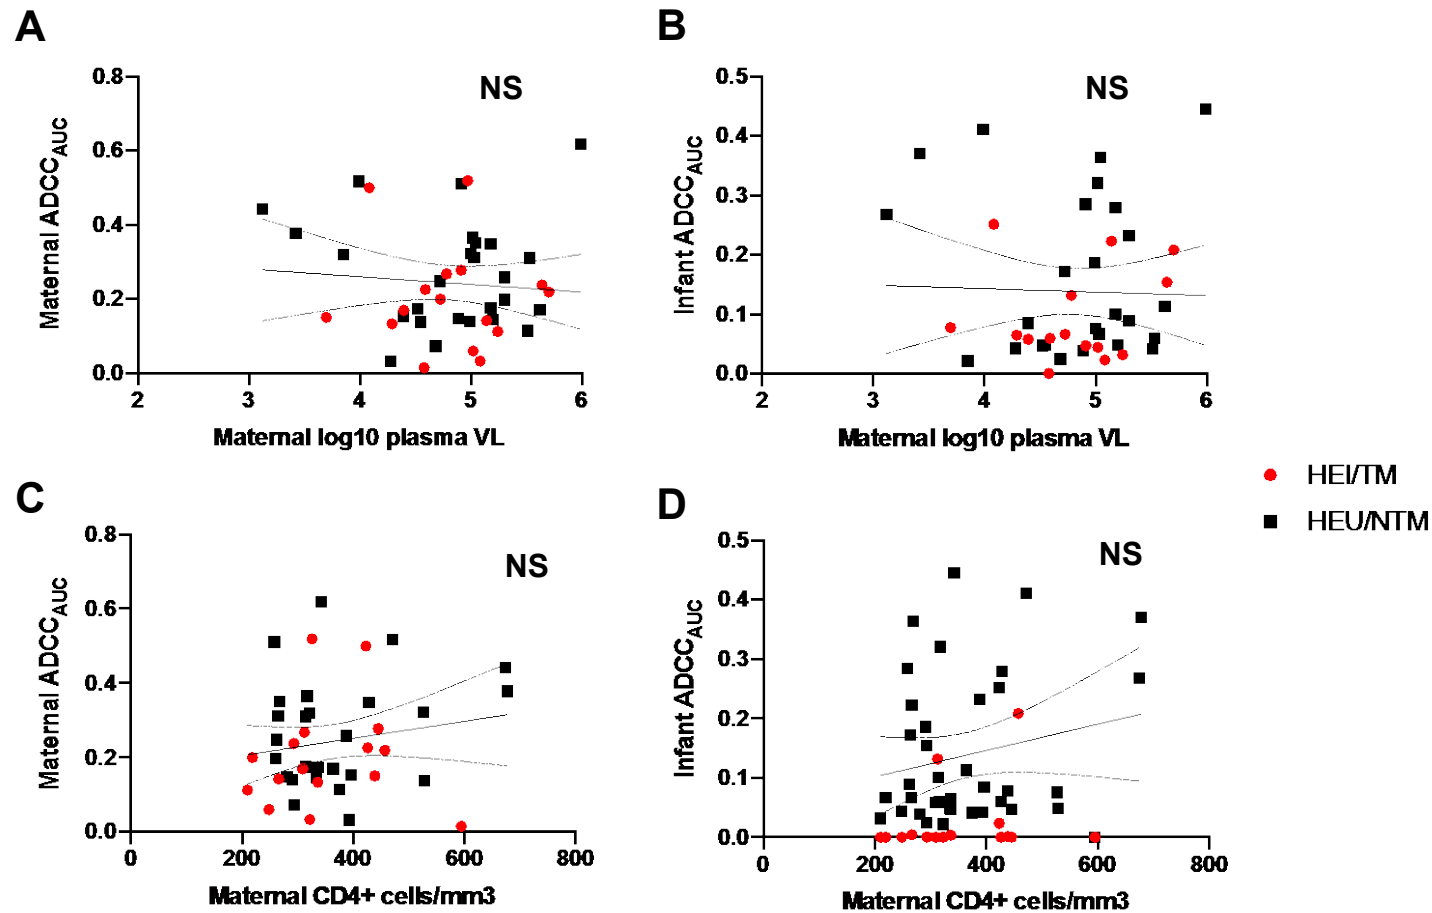

**Figure S4. Maternal viral load and CD4<sup>+</sup> T cell counts do not impact ADCC responses.** Maternal ADCC<sub>AUC</sub> (A&C) and infant ADCC<sub>AUC</sub> (B&D) were compared to maternal log<sub>10</sub> plasma viral load (A&B) and CD4<sup>+</sup> cells/mm<sup>3</sup> (C&D). The red and black dots indicate TMs/ HEI and NTMs/ HEU infants respectively. Correlations were assessed using Spearman's statistic. Line indicates linear regression fit with 95% confidence interval. NS indicates not significant. Related to Figure 4.
